# Supplementary material
Source: Springer Nature journal article supplement (https://www.springermedizin.de/resource/supplementary/12916_2013_1095_MOESM3_ESM.pdf/9598440)
Supplement: MOESM3 [file 9598440]

**Additional File 3.** Odds ratios (95% confidence intervals) for a new incident episode of depression, or recovery from an episode of depression, according to categories of baseline daily alcohol intake, using fixed-effects models. The PREDIMED Study 2003-2010.

| <i>Alcohol intake categories (g/day)</i> | 0        | >0-5             | >5-15            | >15              |
|------------------------------------------|----------|------------------|------------------|------------------|
| Crude model                              | 1 (Ref.) | 0.98 (0.83-1.17) | 0.92 (0.73-1.16) | 0.87 (0.62-1.22) |
| Age-adjusted model                       | 1 (Ref.) | 0.91 (0.66-1.06) | 0.84 (0.66-1.06) | 0.76 (0.54-1.07) |
| Multiple-adjusted model <sup>a</sup>     | 1 (Ref.) | 0.91 (0.76-1.08) | 0.86 (0.67-1.09) | 0.76 (0.53-1.09) |

a Adjusted for age, smoking, physical activity (MET-min/d), total energy intake (Kcal/day), baseline body mass index (kg/m<sup>2</sup>), marital status, and diabetes.
